# Supplementary material
Source: publisher site journal article supplement (https://www.dovepress.com/article/573867)
Supplement: Supplementary file 1 [file 573867%20Appendix.docx]

**Appendix**

Appendix Table 1 PSQI Scores of Pregnant Women in the Sleep Disorder Group and the Normal Group (points)

| Factors | Overall  (N=2210) | Normal Group  (N=1809) | Sleep Disorder Group(N=401) | P-value |
| --- | --- | --- | --- | --- |
| Sleep Quality Score | 0.92±0.65 | 0.77±0.56 | 1.60±0.61 | <0.001 |
| Sleep Latency Score | 0.77±0.73 | 0.64±0.65 | 1.35±0.77 | <0.001 |
| Sleep Duration Score | 0.44±0.70 | 0.25±0.49 | 1.26±0.90 | <0.001 |
| Sleep Efficiency Score | 0.50±0.78 | 0.31±0.56 | 1.37±1.03 | <0.001 |
| Sleep Disturbance Score | 1.16±0.51 | 1.07±0.44 | 1.57±0.57 | <0.001 |
| Use of Sleeping Medication Score | 0.004±0.80 | 0.004±0.00 | 0.09±0.00 | 0.314 |
| Daytime Dysfunction Score | 1.52±1.04 | 1.35±1.00 | 2.31±0.83 | <0.001 |
| Total PSQI Score | 5.32±2.60 | 4.40±1.71 | 9.46±1.77 | <0.001 |

Appendix Table 2 Comparison of Birth Outcomes and PSQI Principal Components

| Birth Outcomes | Principal Component 1: Subjective Sleep Perception and Disturbances | Principal Component 2: Sleep Efficiency and Duration | Principal Component 3: Use of Sleep Medication |
| --- | --- | --- | --- |
| PTB |  |  |  |
| No (N=2081) | -0.003±1.19 | -0.01±1.58 | 0.001±0.98 |
| Yes (N=129) | 0.04±1.20 | 0.18±1.75 | -0.02±1.00 |
| P-value | 0.691 | 0.176 | 0.831 |
| Birth Weight |  |  |  |
| LBW (N=100) | 0.10±1.18 | 0.21±1.83 | -0.04±1.04 |
| Normal Weight (N=1825) | 0.01±1.19 | 0.01±1.57 | 0.0002±0.98 |
| Macrosomia (N=285) | -0.09±1.20 | -0.15±1.60 | 0.01±1.00 |
| P-value | 0.399 | 0.027 | 0.845 |
| Birth Weight and Gestational Age |  |  |  |
| SGA (N=151) | 0.06±1.15 | 0.12±1.78 | -0.005±1.00 |
| AGA (N=1770) | 0.01±1.19 | 0.01±1.57 | -0.004±0.98 |
| LGA (N=289) | -0.08±1.20 | -0.15±1.60 | 0.02±1.00 |
| P-value | 0.528 | 0.042 | 0.900 |

Appendix Table 3 Logistic Regression Analysis Between Sleep Quality Scores and Birth Outcomes

| Birth Outcome | Sleep quality score: 0 points | Sleep quality score: 1 points | P-value | Sleep quality score:2 points | P-value | Sleep quality score: 3 points | P-value |
| --- | --- | --- | --- | --- | --- | --- | --- |
| Cesarean Section | Ref | 1.08(0.86-1.37) | 0.508 | 1.11(0.77-1.59) | 0.575 | 0.46(0.15-1.35) | 0.157 |
| PTB | Ref | 1.08(0.67-1.74) | 0.763 | 0.97(0.48-1.95) | 0.921 | 0.90(0.09-8.54) | 0.924 |
| LBW | Ref | 0.95(0.56-1.63) | 0.858 | 0.94(0.43-2.06) | 0.872 | 0.44(0.04-5.21) | 0.518 |
| SGA | Ref | 1.60(1.00-2.56) | 0.048 | 1.26(0.63-2.54) | 0.511 | 1.75(0.28-11.18) | 0.552 |
| SVN | Ref | 1.35(0.95-1.90) | 0.092 | 1.18(0.70-1.96) | 0.538 | 1.59(0.36-7.00) | 0.542 |
| LGA | Ref | 0.80(0.58-1.09) | 0.150 | 0.68(0.41-1.11) | 0.122 | 1.13(0.28-4.59) | 0.869 |
| Macrosomia | Ref | 0.90(0.50-1.62) | 0.726 | 0.56(0.19-1.59) | 0.274 | 0 | 0.998 |

Adjusted for confounding factors including ethnicity, age, monthly household income, education level, occupation, pre-pregnancy BMI, EPDS score, DVS score, weight gain during mid-pregnancy, parity, history of adverse pregnancy outcomes, smoking, pregnancy complications, and infant sex at birth.

Appendix Table 4 Logistic Regression Analysis Between Sleep Latency Time Scores and Birth Outcomes

| Birth Outcome | Sleep Onset Time Score: 0 points | Sleep Onset Time Score: 1 points | P-value | Sleep Onset Time Score: 2 points | P-value | Sleep Onset Time Score: 3 points | P-value |
| --- | --- | --- | --- | --- | --- | --- | --- |
| Cesarean Section | Ref | 1.01(0.82-1.24) | 0.943 | 1.09(0.77-1.53) | 0.633 | 1.22(0.63-2.36) | 0.561 |
| PTB | Ref | 1.12(0.74-1.70) | 0.592 | 1.48(0.79-2.75) | 0.218 | 1.66(0.54-5.14) | 0.377 |
| LBW | Ref | 1.17(0.73-1.89) | 0.520 | 1.85(0.93-3.68) | 0.082 | 3.41(1.17-9.98) | 0.025 |
| SGA | Ref | 0.92(0.6-1.34) | 0.658 | 0.90(0.49-1.66) | 0.737 | 1.26(0.41-3.90) | 0.687 |
| SVN | Ref | 1.01(0.75-1.35) | 0.973 | 1.14(0.72-1.79) | 0.585 | 1.54(0.67-3.55) | 0.309 |
| LGA | Ref | 1.00(0.76-1.33) | 0.978 | 0.62(0.37-1.04) | 0.069 | 1.26(0.56-2.86) | 0.578 |
| Macrosomia | Ref | 0.65(0.38-1.11) | 0.112 | 0.54(0.20-1.47) | 0.23 | 0.96(0.20-4.46) | 0.953 |

Adjusted for confounding factors including ethnicity, age, monthly household income, education level, occupation, pre-pregnancy BMI, EPDS score, DVS score, weight gain during mid-pregnancy, parity, history of adverse pregnancy outcomes, smoking, pregnancy complications, and infant sex at birth.

Appendix Table 5 Logistic Regression Analysis Between Sleep Duration Scores and Birth Outcomes

| Birth Outcome | Sleep Duration Score: 0 points | Sleep Duration Score: 1 points | P-value | Sleep Duration Score: 2 points | P-value | Sleep Duration Score: 3 points | P-value |
| --- | --- | --- | --- | --- | --- | --- | --- |
| Cesarean Section | Ref | 1.13(0.89-1.43) | 0.320 | 1.11(0.71-1.73) | 0.640 | 0.91(0.41-2.05) | 0.827 |
| PTB | Ref | 1.46(0.94-2.27) | 0.095 | 1.52(0.69-3.36) | 0.302 | 4.26(1.07-16.92) | 0.039 |
| LBW | Ref | 1.26(0.77-2.09) | 0.359 | 0.67(0.22-2.00) | 0.471 | 5.25(1.20-23.06) | 0.028 |
| SGA | Ref | 1.07(0.71-1.62) | 0.748 | 0.50(0.19-1.32) | 0.159 | 5.53(1.49-20.55) | 0.011 |
| SVN | Ref | 1.20(0.88-1.65) | 0.251 | 0.79(0.41-1.51) | 0.471 | 4.14(1.41-12.18) | 0.010 |
| LGA | Ref | 0.84(0.60-1.18) | 0.320 | 1.39(0.79-2.45) | 0.251 | 0.99(0.29-3.36) | 0.991 |
| Macrosomia | Ref | 1.17(0.61-2.23) | 0.638 | 2.24(0.82-6.13) | 0.117 | / | 0.997 |

Adjusted for confounding factors including ethnicity, age, monthly household income, education level, occupation, pre-pregnancy BMI, EPDS score, DVS score, weight gain during mid-pregnancy, parity, history of adverse pregnancy outcomes, smoking, pregnancy complications, and infant sex at birth.

Appendix Table 6 Logistic Regression Analysis of the Association Between Sleep Efficiency Scores and Birth Outcomes

| Birth Outcome | Sleep Efficiency Score: 0 points | Sleep Efficiency Score: 1 points | P-value | Sleep Efficiency Score: 2 points | P-value | Sleep Efficiency Score: 3 points | P-value |
| --- | --- | --- | --- | --- | --- | --- | --- |
| Cesarean Section | Ref | 0.79(0.63-0.99) | 0.044 | 1.107(0.74-1.65) | 0.617 | 1.08(0.58-2.02) | 0.804 |
| PTB | Ref | 0.80(0.50-1.27) | 0.341 | 1.001(0.49-2.03) | 0.998 | 0.42(0.11-1.70) | 0.227 |
| LBW | Ref | 1.05(0.63-1.75) | 0.854 | 1.095(0.48-2.48) | 0.827 | 0.38(0.07-1.99) | 0.250 |
| SGA | Ref | 1.14(0.76-1.73) | 0.530 | 1.487(0.77-2.86) | 0.235 | 0.25(0.06-1.17) | 0.079 |
| SVN | Ref | 1.08(0.79-1.49) | 0.619 | 1.337(0.81-2.22) | 0.26 | 0.34(0.11-1.05) | 0.061 |
| LGA | Ref | 0.93(0.67-1.27) | 0.633 | 0.605(0.33-1.11) | 0.106 | 0.99(0.41-2.39) | 0.976 |
| Macrosomia | Ref | 0.52(0.26-1.04) | 0.063 | 0.614(0.20-1.91) | 0.399 | 0.53(0.06-4.48) | 0.560 |

Adjusted for confounding factors including ethnicity, age, monthly household income, education level, occupation, pre-pregnancy BMI, EPDS score, DVS score, weight gain during mid-pregnancy, parity, history of adverse pregnancy outcomes, smoking, pregnancy complications, and infant sex at birth.

Appendix Table 7 Logistic Regression Analysis of the Association Between Sleep Disturbance Scores and Birth Outcomes

| Birth Outcome | Sleep Disorder Score: 0 points | Sleep Disorder Score: 1 points | P-value | Sleep Disorder Score: 2 points | P-value | Sleep Disorder Score: 3 points | P-value |
| --- | --- | --- | --- | --- | --- | --- | --- |
| Cesarean Section | Ref | 1.16(0.75-1.78) | 0.502 | 0.93(0.57-1.51) | 0.768 | 1.71(0.53-5.51) | 0.372 |
| PTB | Ref | 0.66(0.31-1.41) | 0.283 | 0.61(0.25-1.47) | 0.271 | / | 0.998 |
| LBW | Ref | 1.32(0.46-3.81) | 0.608 | 1.01(0.31-3.33) | 0.986 | 3.80(0.52-27.60) | 0.187 |
| SGA | Ref | 1.22(0.51-2.92) | 0.648 | 0.88(0.33-2.33) | 0.797 | 1.59(0.24-10.76) | 0.633 |
| SVN | Ref | 0.80(0.45-1.42) | 0.447 | 0.58(0.30-1.13) | 0.109 | 0.50(0.09-2.79) | 0.431 |
| LGA | Ref | 0.86(0.50-1.49) | 0.588 | 0.93(0.49-1.76) | 0.825 | 0.38(0.04-3.35) | 0.385 |
| Macrosomia | Ref | 0.57(0.23-1.44) | 0.232 | 0.93(0.31-2.80) | 0.904 | / | 0.998 |

Adjusted for confounding factors including ethnicity, age, monthly household income, education level, occupation, pre-pregnancy BMI, EPDS score, DVS score, weight gain during mid-pregnancy, parity, history of adverse pregnancy outcomes, smoking, pregnancy complications, and infant sex at birth.

Appendix Table 8 Logistic Regression Analysis of the Association Between Daytime Dysfunction Scores and Birth Outcomes

| Birth outcome | Daytime Dysfunction Score: 0 points | Daytime Dysfunction Score: 1 points | P-value | Daytime Dysfunction Score: 2 points | P-value | Daytime Dysfunction Score: 3 points | P-value |
| --- | --- | --- | --- | --- | --- | --- | --- |
| Cesarean Section | Ref | 1.12(0.85-1.48) | 0.413 | 1.03(0.78-1.36) | 0.843 | 1.08(0.79-1.47) | 0.646 |
| PTB | Ref | 0.91(0.53-1.56) | 0.727 | 0.91(0.53-1.55) | 0.721 | 1.12(0.62-2.04) | 0.710 |
| LBW | Ref | 0.85(0.47-1.55) | 0.605 | 0.76(0.42-1.40) | 0.381 | 1.01(0.52-1.95) | 0.985 |
| SGA | Ref | 0.70(0.42-1.16) | 0.165 | 0.89(0.55-1.45) | 0.649 | 0.81(0.46-1.41) | 0.452 |
| SVN | Ref | 0.79(0.53-1.15) | 0.218 | 0.94(0.64-1.36) | 0.728 | 1.03(0.67-1.57) | 0.910 |
| LGA | Ref | 1.27(0.87-1.84) | 0.221 | 1.13(0.77-1.66) | 0.542 | 1.54(1.01-2.36) | 0.045 |
| Macrosomia | Ref | 0.73(0.37-1.47) | 0.384 | 0.79(0.39-1.60) | 0.512 | 1.03(0.47-2.25) | 0.947 |

Adjusted for confounding factors including ethnicity, age, monthly household income, education level, occupation, pre-pregnancy BMI, EPDS score, DVS score, weight gain during mid-pregnancy, parity, history of adverse pregnancy outcomes, smoking, pregnancy complications, and infant sex at birth.

Appendix Table 9 Variance Inflation Factor (VIF) for Variables in the Primary Multivariable Logistic Regression Models.

| Variable | Model A: Factors for Sleep Disorders | Model B: Sleep Disorders and Birth Outcomes | Model C: Stratified by Pre-pregnancy BMI | | Model D: Stratified by Fetal Gender | |
| --- | --- | --- | --- | --- | --- | --- |
| <24 | ≥24 | Male | Female |
| Sociodemographic Factors |  |  |  |  |  |  |
| Age | 1.15 | 1.16 | 1.16 | 1.18 | 1.15 | 1.18 |
| Ethnicity | 1.01 | 1.01 | 1.02 | 1.03 | 1.02 | 1.03 |
| Education level | 1.25 | 1.25 | 1.24 | 1.35 | 1.26 | 1.25 |
| Occupation | 1.04 | 1.04 | 1.04 | 1.11 | 1.06 | 1.05 |
| monthly income | 1.16 | 1.16 | 1.17 | 1.20 | 1.16 | 1.18 |
| Anthropometric & Clinical Factors |  |  |  |  |  |  |
| Pre-pregnancy BMI | 1.03 | 1.03 |  |  | 1.05 | 1.04 |
| Number of births | 1.47 | 1.47 | 1.42 | 1.80 | 1.51 | 1.48 |
| Abnormal pregnancy history | 1.07 | 1.07 | 1.06 | 1.19 | 1.08 | 1.08 |
| Cesarean section history | 1.40 | 1.40 | 1.34 | 1.64 | 1.41 | 1.40 |
| Assisted reproduction | 1.02 | 1.02 | 1.02 | 1.07 | 1.04 | 1.05 |
| Past medical history | 1.17 | 1.18 | 1.20 | 1.18 | 1.25 | 1.13 |
| Mid-pregnancy weight gain | 1.02 | 1.02 | 1.03 | 1.10 | 1.05 | 1.03 |
| Pregnancy complications | 1.17 | 1.17 | 1.19 | 1.16 | 1.23 | 1.13 |
| Gender |  | 1.01 | 1.01 | 1.05 |  |  |
| Lifestyle & Psychological Factors |  |  |  |  |  |  |
| EPDS | 1.03 | 1.06 | 1.06 | 1.14 | 1.08 | 1.07 |
| DVS | 1.05 | 1.05 | 1.06 | 1.09 | 1.06 | 1.07 |
| Pregnancy dietary taste | 1.05 | 1.05 | 1.06 | 1.06 | 1.07 | 1.06 |
| Early pregnancy anemia | 1.04 | 1.06 | 1.06 | 1.12 | 1.06 | 1.06 |
| Pregnancy exercise | 1.03 | 1.03 | 1.04 | 1.08 | 1.04 | 1.04 |
| Pre-pregnancy smoking | 1.04 | 1.04 | 1.05 | 1.07 | 1.04 | 1.08 |
| Pre-pregnancy drinking | 1.05 | 1.05 | 1.07 | 1.09 | 1.03 | 1.11 |
| Core Exposure |  |  |  |  |  |  |
| Sleep disorder |  | 1.07 | 1.06 | 1.17 | 1.06 | 1.10 |
| Maximum VIF in Model | 1.47 | 1.47 | 1.42 | 1.80 | 1.51 | 1.48 |

Model A examines factors influencing sleep disorders (Table 4 in the main text). Model B examines the association between sleep disorders and various birth outcomes (Table 6 in the main text), with identical VIFs across outcomes due to the same covariate set. Models C and D present VIFs for the stratified analyses (Table 7 in the main text) by pre-pregnancy BMI and fetal gender, respectively. All VIF values are well below the threshold of 5, indicating no severe multicollinearity.

Appendix Table 10 Hosmer-Lemeshow Goodness-of-fit Test Results for Binary Logistic Regression Models.

| Model Category | Specific Model | Sample Size (n) | Hosmer-Lemeshow χ2 | df | P-value |
| --- | --- | --- | --- | --- | --- |
| Primary Exposure Model | Sleep disorder | 2210 | 9.16 | 8 | 0.329 |
| Primary Outcome Models | Cesarean Section | 2210 | 2.52 | 8 | 0.961 |
|  | PTB | 2210 | 8.46 | 8 | 0.39 |
|  | LBW | 2210 | 10.28 | 8 | 0.246 |
|  | SGA | 2210 | 8.49 | 8 | 0.387 |
|  | SVN | 2210 | 7.12 | 8 | 0.523 |
|  | LGA | 2210 | 5.17 | 8 | 0.739 |
|  | Macrosomia | 2210 | 6.21 | 8 | 0.624 |
| Stratified Analysis - PTB | PTB (BMI <24 kg/m2) * | 1789 | 11.71 | 8 | 0.164 |
|  | PTB (BMI ≥24 kg/m2) * | 421 | 4.43 | 8 | 0.817 |
|  | PTB (Male Fetus) * | 1135 | 7.55 | 8 | 0.479 |
|  | PTB (Female Fetus) * | 1075 | 3.91 | 8 | 0.865 |
| Stratified Analysis - LBW | LBW (BMI <24 kg/m2) * | 1789 | 7.75 | 8 | 0.458 |
|  | LBW (BMI ≥24 kg/m2) * | 421 | 7.59 | 8 | 0.474 |
|  | LBW (Male Fetus) * | 1135 | 13.49 | 8 | 0.096 |
|  | LBW (Female Fetus) * | 1075 | 2.19 | 8 | 0.975 |
| Stratified Analysis - SGA | SGA (BMI <24 kg/m2) * | 1789 | 10.60 | 8 | 0.226 |
|  | SGA (BMI ≥24 kg/m2) * | 421 | 5.49 | 8 | 0.705 |
| Stratified Analysis - SVN | SVN (BMI <24 kg/m2) * | 1789 | 6.25 | 8 | 0.62 |
|  | SVN (BMI ≥24 kg/m2) * | 421 | 10.34 | 8 | 0.242 |
|  | SVN (Male Fetus) * | 1135 | 3.12 | 8 | 0.927 |
|  | SVN (Female Fetus) * | 1075 | 7.51 | 8 | 0.483 |
| Stratified Analysis - LGA | LGA (Female Fetus) * | 1075 | 4.92 | 8 | 0.766 |

Models marked with an asterisk (*) represent stratified analyses where a significant interaction was observed (P-interaction < 0.05) or where subgroup-specific effects of particular clinical interest were identified, as detailed in Table 7 of the main text. All models demonstrated adequate fit (P > 0.05).

**Appendix 1 Questionnaire(Chinese Version)**

**汉阳孕妈妈健康行为自查问卷**

为了更好的了解您孕期健康情况，现对您近期健康行为、心理和睡眠进行调查，问卷填完后会有相应的健康指导。本问卷内容我们会严格保密，请放心填写。十分感谢您对我们汉阳孕校工作的配合，祝孕妈分娩顺利，母子平安！

**一、基本信息**

您的姓名: *__________ 您的手机号码: *__________ [填空题] *

请输入您的出生日期: [填空题]

_________________________________

您的民族 [单选题] *

| ○汉族 |
| --- |
| ○其他 |

您的末次月经: [填空题]

_________________________________

您的文化程度 [单选题] *

| ○高中、中专及以下 |
| --- |
| ○大专/本科 |
| ○研究生及以上 |

您的职业: [单选题] *

| ○办事人员和有关人员（在国家机关、党群组织等从事行政业务） |
| --- |
| ○专业技术人员（医生、老师、工程师、计算机、会计、文艺工作者等） |
| ○商业服务人员（销售、餐饮服务、旅游健身等服务业工作人员） |
| ○其他 |

夫妻的人均月收入是 [单选题] *

| ○＜5000元 |
| --- |
| ○5000-9999元 |
| ○≥10000元 |

您最近体重:________kg，身高:________cm，孕前体重（怀孕前正常体重）:________ kg [填空题] *

孕产史:孕:___ 产:___ ;（本次是第几次怀孕，已经有过几次分娩） [填空题] *

有无剖宫产史（一胎妈妈均选无） [单选题] *

| ○无 |
| --- |
| ○有 |

本次是否为人工辅助生殖? [单选题] *

| ○否 |
| --- |
| ○是 |

既往疾病史 [多选题] *

| □无 |
| --- |
| □糖尿病 |
| □高血压 |
| □甲状腺疾病 |
| □传染病 |
| □抑郁症 |
| □过敏史 |
| □其他 _________________* |

孕期是否出现以下疾病? [多选题] *

| □否 |
| --- |
| □妊娠期糖尿病 |
| □妊娠期高血压 |
| □甲状腺疾病 |
| □其他 _________________* |

 备孕至今，您是否服用过叶酸? [单选题] *

| ○经常服用（按医嘱服用，每周服用5天及以上并持续服用不少于4周） |
| --- |
| ○偶尔服用（每周服用不足5天） |
| ○未服用 |

备孕至今，您是否服用过钙制剂? [单选题] *

| ○经常服用（按医嘱服用，每周服用5天及以上并持续服用不少于4周） |
| --- |
| ○偶尔服用（每周服用不足5天） |
| ○未服用 |

 备孕至今，您是否服用过铁制剂? [单选题] *

| ○经常服用（按医嘱服用，每周服用5天及以上并持续服用不少于4周） |
| --- |
| ○偶尔服用（每周服用不足5天） |
| ○未服用 |

备孕至今，您是否服用过复合维生素制剂? [单选题] *

| ○经常服用（按医嘱服用，每周服用5天及以上并持续服用不少于4周） |
| --- |
| ○偶尔服用（每周服用不足5天） |
| ○未服用 |

备孕至今，您是否服用过DHA制剂? [单选题] *

| ○经常服用（按医嘱服用，每周服用5天及以上并持续服用不少于4周） |
| --- |
| ○偶尔服用（每周服用不足5天） |
| ○未服用 |

 您最近一个月有规律锻炼吗?（规律锻炼：每周三次及以上的中、高强度运动，每次持续30分钟及以上） [单选题] *

| ○有 |
| --- |
| ○无 |

您孕前一个月内凡有任何规律性或间歇性主动吸烟吗? [单选题] *

| ○有 |
| --- |
| ○无 |

您孕前一个月内至少喝过白酒40 mL、啤酒半瓶、红酒125 mL中任一种吗? [单选题] *

| ○有 |
| --- |
| ○无 |

自发现本次怀孕以来，您是否有过呕吐现象?（轻度:指仅有恶心者;中度:可以进食但经常会吐;重度:呕吐几乎不能进食） [单选题] *

| ○无 |
| --- |
| ○轻度没有治疗 |
| ○中度没有治疗 |
| ○重度用药治疗 |

您孕早期有过贫血（血红蛋白HB<110 g/L）吗? [单选题] *

| ○有 |
| --- |
| ○无 |

**二、饮食行为**

 鱼虾贝类（鱼/虾/蟹/海蜇/贝类/螺类等）食用频率 [单选题] *

| ○几乎不吃 |
| --- |
| ○1~2次/周 |
| ○3~5次/周 |
| ○几乎每天都吃 |

畜禽肉类（猪肉/羊肉/牛肉/鸡肉/鸭肉等）食用频率 [单选题] *

| ○几乎不吃 |
| --- |
| ○1~2次/周 |
| ○3~5次/周 |
| ○几乎每天都吃 |

蛋类（鸡蛋/鸭蛋/鹌鹑蛋等）食用频率 [单选题] *

| ○几乎不吃 |
| --- |
| ○1~2次/周 |
| ○3~5次/周 |
| ○几乎每天都吃 |

奶及奶制品（牛奶/奶粉/羊奶/奶酪/酸奶等）食用频率 [单选题] *

| ○几乎不吃 |
| --- |
| ○1~2次/周 |
| ○3~5次/周 |
| ○几乎每天都吃 |

豆制品（豆腐/豆浆/千张/腐竹等）食用频率 [单选题] *

| ○几乎不吃 |
| --- |
| ○1~2次/周 |
| ○3~5次/周 |
| ○几乎每天都吃 |

坚果（核桃/开心果/夏威夷果/松子等）食用频率 [单选题] *

| ○几乎不吃 |
| --- |
| ○1~2次/周 |
| ○3~5次/周 |
| ○几乎每天都吃 |

深色蔬菜（生菜/油麦菜/菠菜等绿叶蔬菜、胡萝卜/西红柿/南瓜等红黄色蔬菜）食用频率 [单选题] *

| ○几乎不吃 |
| --- |
| ○1~2次/周 |
| ○3~5次/周 |
| ○几乎每天都吃 |

海藻类（海藻/裙带菜/海带/紫菜等）食用频率 [单选题] *

| ○几乎不吃 |
| --- |
| ○1~2次/周 |
| ○3~5次/周 |
| ○几乎每天都吃 |

薯类（土豆/紫薯/红薯/芋头等）食用频率 [单选题] *

| ○几乎不吃 |
| --- |
| ○1~2次/周 |
| ○3~5次/周 |
| ○几乎每天都吃 |

新鲜水果（苹果/香蕉/荔枝/哈密瓜等）食用频率 [单选题] *

| ○几乎不吃 |
| --- |
| ○1~2次/周 |
| ○3~5次/周 |
| ○几乎每天都吃 |

含糖饮料（红茶、绿茶、可乐、雪碧、果汁等）饮用频率 [单选题] *

| ○几乎不吃 |
| --- |
| ○1~2次/周 |
| ○3~5次/周 |
| ○几乎每天都吃 |

油脂类食用频率 [单选题] *

| ○几乎不吃 |
| --- |
| ○1~2次/周 |
| ○3~5次/周 |
| ○几乎每天都吃 |

您平时膳食口味的习惯 [单选题] *

| ○清淡 |
| --- |
| ○一般 |
| ○重口味 |

**Appendix 2 Questionnaire(English Version)**

**Health Behavior Self-Assessment Questionnaire for Pregnant Women in Hanyang**

To better understand your health during pregnancy, we are conducting a survey on your recent health behaviors, mental well-being, and sleep. After completing the questionnaire, you will receive corresponding health guidance. We will keep all the information strictly confidential, so please feel at ease when filling it out. Thank you very much for your cooperation with our Hanyang Maternity School. We wish you a smooth delivery and the health and safety of both you and your baby!

1. Basic Information

Name: *__________ Phone number: *__________ [Completion] *

Please enter your date of birth: [Completion]

_________________________________

Your nation [Single choice] *

| ○The Han nationality |
| --- |
| ○Other |

Your last menstrual period: [Completion]

_________________________________

Your educational background [Single choice] *

| ○High school, vocational school and below |
| --- |
| ○Associate Degree / Bachelor's Degree |
| ○Master's degree or above |

Your Occupation: [Single choice] *

| ○Office staff and related personnel (engaged in administrative work in government agencies, party and mass organizations, etc.) |
| --- |
| ○Professional and technical personnel (doctors, teachers, engineers, computer specialists, accountants, artists, etc.) |
| ○Commercial service personnel (sales, food and beverage service, tourism, fitness, and other service industry workers) |
| ○ Other |

The couple's average monthly income per person is [Single choice] *

| ○Less than 5,000 yuan |
| --- |
| ○5,000–9,999 yuan |
| ○10,000 yuan or more |

Your recent weight:________kg, height:________cm, pre-pregnancy weight (normal weight before pregnancy):________ kg [Completion] *

Obstetric history: Pregnancies:___ Births:___ ; (Which pregnancy is this, and how many deliveries have you had before?) [Completion] *

History of cesarean section (first-time mothers all select "No") [Single choice] *

| ○No |
| --- |
| ○Yes |

Is this time assisted reproductive technology? [Single choice] *

| ○No |
| --- |
| ○Yes |

Past Medical History [Multiple Choice] *

| □No |
| --- |
| □Diabetes |
| □Hypertension |
| □Thyroid Disease |
| □ Infectious Diseases |
| □Depression |
| □Allergy History |
| □Other _________________* |

Did you experience any of the following conditions during pregnancy? [Multiple choice] *

| □No |
| --- |
| □Gestational diabetes |
| □Gestational hypertension |
| □Thyroid disease |
| □Other _________________* |

Since you started preparing for pregnancy, have you taken folic acid? [Single choice] *

| ○Regularly (taken as prescribed, 5 or more days per week, continuously for at least 4 weeks) |
| --- |
| ○Occasionally (taken less than 5 days per week) |
| ○Not taken |

Since you started trying to conceive, have you taken any calcium supplements? [Single choice] *

| ○Regularly (taken as prescribed, 5 or more days per week, continuously for at least 4 weeks) |
| --- |
| ○Occasionally (taken less than 5 days per week) |
| ○Not taken |

Since you started trying to conceive, have you taken any iron supplements? [Single choice] *

| ○Regularly (taken as prescribed, 5 or more days per week, continuously for at least 4 weeks) |
| --- |
| ○Occasionally (taken less than 5 days per week) |
| ○Not taken |

Since you started trying to conceive, have you taken any multivitamin supplements? [Single choice] *

| ○Regularly (taken as prescribed, 5 or more days per week, continuously for at least 4 weeks) |
| --- |
| ○Occasionally (taken less than 5 days per week) |
| ○Not taken |

Since you started trying to conceive, have you taken any DHA supplements? [Single choice] *

| ○Regularly (taken as prescribed, 5 or more days per week, continuously for at least 4 weeks) |
| --- |
| ○Occasionally (taken less than 5 days per week) |
| ○Not taken |

 Have you been exercising regularly in the past month? (Regular exercise: moderate to high-intensity exercise at least three times a week, each session lasting 30 minutes or more) [Single choice] *

| ○Yes |
| --- |
| ○No |

Did you smoke regularly or intermittently at any time within one month before pregnancy? [Single choice] *

| ○Yes |
| --- |
| ○No |

In the month before pregnancy, did you drink at least one of the following: 40 mL of white liquor, half a bottle of beer, or 125 mL of red wine? [Single choice] *

| ○Yes |
| --- |
| ○No |

Since discovering this pregnancy, have you experienced any vomiting? (Mild: nausea only; Moderate: able to eat but vomits frequently; Severe: vomiting to the point of being almost unable to eat) [Single choice] *

| ○None |
| --- |
| ○Mild - no treatment |
| ○Moderate - no treatment |
| ○Severe - medication treatment |

Have you experienced anemia (hemoglobin HB <110 g/L) during early pregnancy? [Single choice] *

| ○Yes |
| --- |
| ○No |

2. Eating Behavior

 Frequency of Eating Fish, Shrimp, and Shellfish (Fish/Shrimp/Crab/Jellyfish/Shellfish/Snails, etc.) [Single choice] *

| ○Almost never eat |
| --- |
| ○1–2 times per week |
| ○3–5 times per week |
| ○Almost every day |

Frequency of consumption of livestock and poultry meat (pork/lamb/beef/chicken/duck, etc.) [Single choice] *

| ○Almost never eat |
| --- |
| ○1–2 times per week |
| ○3–5 times per week |
| ○Almost every day |

Frequency of consumption of eggs (chicken eggs/duck eggs/quail eggs, etc.) [Single choice] *

| ○Almost never eat |
| --- |
| ○1–2 times per week |
| ○3–5 times per week |
| ○Almost every day |

Frequency of consumption of milk and dairy products (cow's milk/milk powder/goat's milk/cheese/yogurt, etc.) [Single choice] *

| ○Almost never eat |
| --- |
| ○1–2 times per week |
| ○3–5 times per week |
| ○Almost every day |

Frequency of consumption of soy products (tofu/soy milk/thousand-layer tofu/dried bean curd sticks, etc.) [Single choice] *

| ○Almost never eat |
| --- |
| ○1–2 times per week |
| ○3–5 times per week |
| ○Almost every day |

Frequency of Nut Consumption (Walnuts/Pistachios/Macadamia Nuts/Pine Nuts, etc.) [Single choice] *

| ○Almost never eat |
| --- |
| ○1–2 times per week |
| ○3–5 times per week |
| ○Almost every day |

Frequency of consumption of dark-colored vegetables (leafy greens such as lettuce, romaine, spinach; red and yellow vegetables such as carrots, tomatoes, pumpkin) [Single choice] *

| ○Almost never eat |
| --- |
| ○1–2 times per week |
| ○3–5 times per week |
| ○Almost every day |

Frequency of consumption of seaweed varieties (seaweed/kelp/wakame/nori, etc.) [Single choice] *

| ○Almost never eat |
| --- |
| ○1–2 times per week |
| ○3–5 times per week |
| ○Almost every day |

Frequency of consumption of tubers (potatoes/purple sweet potatoes/sweet potatoes/taro, etc.) [Single choice] *

| ○Almost never eat |
| --- |
| ○1–2 times per week |
| ○3–5 times per week |
| ○Almost every day |

Frequency of consumption of fresh fruits (apples/bananas/lychees/Hami melon, etc.) [Single choice] *

| ○Almost never eat |
| --- |
| ○1–2 times per week |
| ○3–5 times per week |
| ○Almost every day |

Frequency of consumption of sugary beverages (black tea, green tea, cola, Sprite, fruit juice, etc.) [Single choice] *

| ○Almost never eat |
| --- |
| ○1–2 times per week |
| ○3–5 times per week |
| ○Almost every day |

Frequency of consuming fatty foods [Single choice] *

| ○Almost never eat |
| --- |
| ○1–2 times per week |
| ○3–5 times per week |
| ○Almost every day |

Your usual dietary taste preference [Single choice] *

| ○Light |
| --- |
| ○Moderate |
| ○Strong flavor |
